# Supplementary material for: The (cost) effectiveness of procedural sedation and analgesia versus general anaesthesia for hysteroscopic myomectomy, a multicentre randomised controlled trial: PROSECCO trial, a study protocol
Source: Springer Nature journal article supplement (doi:10.1186/s12905-019-0742-1), 2019-03-22
Supplement: MOESM1 [file 16571088]

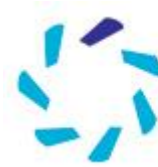

## Vragenlijst bijwerkingen operatie na 24 uur.

1. Datum van invullen: .....(dd/mm/jaar)

2. Hoe misselijk bent u op dit moment?

Omcirkel hieronder alstublieft het getal dat het beste uw mate van misselijkheid op dit moment aangeeft. Een '0' betekent niet misselijk, een '10' betekent de meest denkbare misselijkheid.

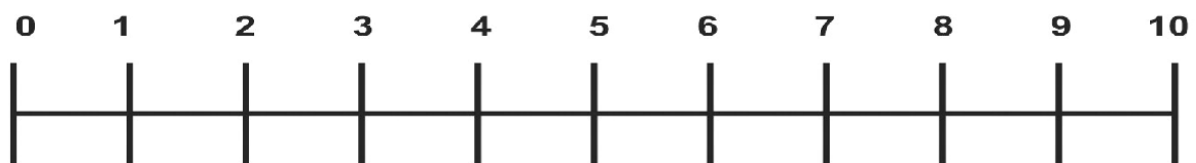

Niet  
misselijk

Meest  
denkbare  
misselijkheid

3. Hebt u moeten overgeven na de operatie?

Ja

Nee

Indien u de vorige vraag met ja hebt beantwoord:

4. Hoe vaak hebt u na de operatie moeten overgeven? ..... keer

5. Hoeveel pijn hebt u op dit moment?

Omcirkel hieronder alstublieft het getal dat het beste uw pijn op dit moment aangeeft. Een '0' betekent geen pijn, een '10' betekent de meest denkbare pijn.

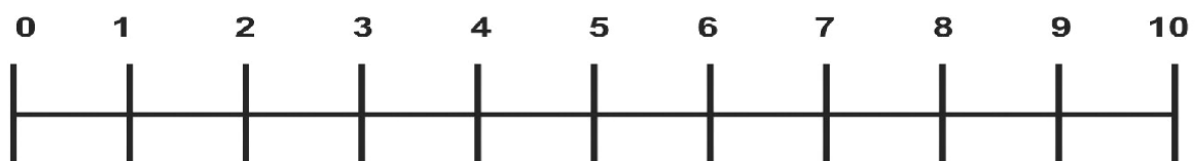

Geen pijn

Meest  
denkbare  
pijn
