# Supplementary material for: The (cost) effectiveness of procedural sedation and analgesia versus general anaesthesia for hysteroscopic myomectomy, a multicentre randomised controlled trial: PROSECCO trial, a study protocol
Source: Springer Nature journal article supplement (doi:10.1186/s12905-019-0742-1), 2019-03-22
Supplement: MOESM2 [file 16571088]

**Questionnaire on side effects 24 hours after hysteroscopic myomectomy**

1. Date while filling in this questionnaire: .....(day/month/year)

2. How nauseous are you at the moment?

At this scale, please mark the number that indicates how nauseous you feel at the moment. '0' means you don't experience any nausea, '10' means the most extreme nausea you can imagine.

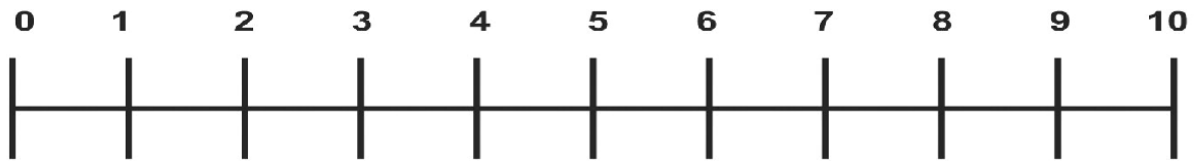

No  
nausea

Most extreme  
nausea

3. Did you have to throw up after the surgery?

- Yes
- No

Did you check yes? Go to question 4. Otherwise skip to question 5.

4. How many times did you have to throw up after the surgery?.....times

5. How much pain do you experience at the moment?

At this scale, please mark the number that indicates how much pain you experience at the moment. '0' means you don't experience any pain, '10' means the most extreme pain you can imagine.

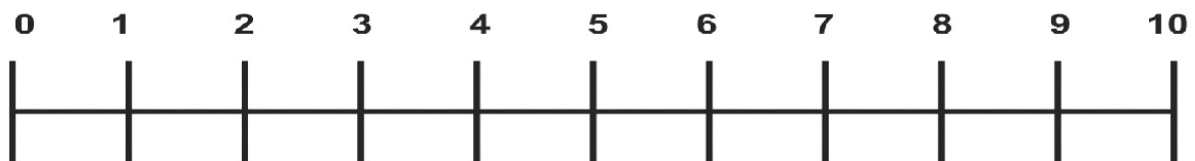

No pain

Worst  
pain you  
can  
imagine
