# Supplementary material for: The (cost) effectiveness of procedural sedation and analgesia versus general anaesthesia for hysteroscopic myomectomy, a multicentre randomised controlled trial: PROSECCO trial, a study protocol
Source: Springer Nature journal article supplement (doi:10.1186/s12905-019-0742-1), 2019-03-22
Supplement: MOESM3 [file 16571088]

**MENSTRUATIESCOREKAART** MAAND \_\_\_\_\_ JAAR \_\_\_\_\_ PT. INITIALEN \_\_\_\_\_ GEBOORTEDATUM \_\_-\_\_-\_\_\_\_ Case number: \_\_ - \_\_\_\_

**Handleiding voor het gebruik van de menstratiescorekaart**

**Follow-up: 3 / 6 / 12 maanden (omcirkelen wat van toepassing is)**

- U kunt met deze kaart de menstruatie gedurende één maand bijhouden.
- Gebruik bij voorkeur maxi maandverband en/of maxi tampons.
- Wees niet zuinig met het gebruik van verbanden en tampons en probeer hierin zoveel mogelijk al het menstratiebloed op te vangen.
- Denk eraan ook 's nachts voldoende verband/tampons te gebruiken, zo nodig beide tegelijk.
- Houd bij voorkeur een tampon in tijdens plassen, ontlasting, douche of bad en verwissel pas daarna.
- Elke keer wanneer u een verband of tampon verwijdt, vergelijkt u het zichtbare bloedverlies met de afbeeldingen op de menstratiescorekaart en zet u een verticaal streepje ('turven') in het hokje naast het plaatje dat het meest daarmee overeenkomt. De cijfers in de bovenste rij komen overeen met de dag van de maand.
- Op de dagen dat u alleen wat licht bloedverlies heeft (spotting) kunt u een kruisje zetten in het vakje van die dag.

**Geen bloeding deze maand** OF **BLOEDING OP BEPAALDE DAGEN VAN DEZE MAAND INVULLEN:**

| VERBAND              | 1 | 2 | 3 | 4 | 5 | 6 | 7 | 8 | 9 | 10 | 11 | 12 | 13 | 14 | 15 | 16 | 17 | 18 | 19 | 20 | 21 | 22 | 23 | 24 | 25 | 26 | 27 | 28 | 29 | 30 | 31 |
|----------------------|---|---|---|---|---|---|---|---|---|----|----|----|----|----|----|----|----|----|----|----|----|----|----|----|----|----|----|----|----|----|----|
|                      |   |   |   |   |   |   |   |   |   |    |    |    |    |    |    |    |    |    |    |    |    |    |    |    |    |    |    |    |    |    |    |
|                      |   |   |   |   |   |   |   |   |   |    |    |    |    |    |    |    |    |    |    |    |    |    |    |    |    |    |    |    |    |    |    |
|                      |   |   |   |   |   |   |   |   |   |    |    |    |    |    |    |    |    |    |    |    |    |    |    |    |    |    |    |    |    |    |    |
| TAMPON               | 1 | 2 | 3 | 4 | 5 | 6 | 7 | 8 | 9 | 10 | 11 | 12 | 13 | 14 | 15 | 16 | 17 | 18 | 19 | 20 | 21 | 22 | 23 | 24 | 25 | 26 | 27 | 28 | 29 | 30 | 31 |
|                      |   |   |   |   |   |   |   |   |   |    |    |    |    |    |    |    |    |    |    |    |    |    |    |    |    |    |    |    |    |    |    |
|                      |   |   |   |   |   |   |   |   |   |    |    |    |    |    |    |    |    |    |    |    |    |    |    |    |    |    |    |    |    |    |    |
|                      |   |   |   |   |   |   |   |   |   |    |    |    |    |    |    |    |    |    |    |    |    |    |    |    |    |    |    |    |    |    |    |
| STOLSELS<br>(x = Ja) |   |   |   |   |   |   |   |   |   |    |    |    |    |    |    |    |    |    |    |    |    |    |    |    |    |    |    |    |    |    |    |
| SPOTTING<br>(x = Ja) |   |   |   |   |   |   |   |   |   |    |    |    |    |    |    |    |    |    |    |    |    |    |    |    |    |    |    |    |    |    |    |
| PIJNSCORE*           |   |   |   |   |   |   |   |   |   |    |    |    |    |    |    |    |    |    |    |    |    |    |    |    |    |    |    |    |    |    |    |

\* Pijnscore: 0 = geen, 1 = mild, 2 = middelmatig, 3 = ernstig
