# Supplementary material for: The (cost) effectiveness of procedural sedation and analgesia versus general anaesthesia for hysteroscopic myomectomy, a multicentre randomised controlled trial: PROSECCO trial, a study protocol
Source: Springer Nature journal article supplement (doi:10.1186/s12905-019-0742-1), 2019-03-22
Supplement: MOESM5 [file 16571088]

Initialen patiënt: \_\_\_\_\_

Patiëntnummer: \_\_\_\_\_

Datum: \_\_\_\_\_

**VRAGENLIJST OVER SYMPTOMEN EN GEZONDHEIDSGERELATEERDE KWALITEIT VAN LEVEN  
BIJ MYOMEN (UFS-QOL NL)**

Hieronder worden symptomen beschreven die vrouwen met myomen ervaren. Beoordeel elk symptoom aan de hand van uw myomen of menstruatiecyclus. Het is de bedoeling dat u steeds aangeeft hoeveel last u de afgelopen drie maanden van het betreffende symptoom heeft gehad.

Er zijn geen goede of foute antwoorden. Beantwoord elke vraag door het keuzevakje aan te vinken (✓) dat het beste bij uw antwoord past. Als een vraag niet op u van toepassing is, vinkt u het antwoord "Niet van toepassing" aan.

| Hoeveel last heeft u de afgelopen drie maanden gehad van...                                   | Geen                          | Een klein beetje              | Enigszins                     | Veel                          | Heel veel                     | Niet van toepassing                |
|-----------------------------------------------------------------------------------------------|-------------------------------|-------------------------------|-------------------------------|-------------------------------|-------------------------------|------------------------------------|
| 1. Hevig bloedverlies tijdens uw menstruatieperiode?                                          | <input type="checkbox"/><br>1 | <input type="checkbox"/><br>2 | <input type="checkbox"/><br>3 | <input type="checkbox"/><br>4 | <input type="checkbox"/><br>5 | <input type="checkbox"/><br>n.v.t. |
| 2. Verlies van bloedstolsels tijdens uw menstruatieperiode?                                   | <input type="checkbox"/><br>1 | <input type="checkbox"/><br>2 | <input type="checkbox"/><br>3 | <input type="checkbox"/><br>4 | <input type="checkbox"/><br>5 | <input type="checkbox"/><br>n.v.t. |
| 3. Schommelingen in de duur van uw menstruatieperiode in vergelijking met uw vorige cyclus?   | <input type="checkbox"/><br>1 | <input type="checkbox"/><br>2 | <input type="checkbox"/><br>3 | <input type="checkbox"/><br>4 | <input type="checkbox"/><br>5 | <input type="checkbox"/><br>n.v.t. |
| 4. Schommelingen in de tijd tussen twee menstruatieperiodes in vergelijking met vorige cycli? | <input type="checkbox"/><br>1 | <input type="checkbox"/><br>2 | <input type="checkbox"/><br>3 | <input type="checkbox"/><br>4 | <input type="checkbox"/><br>5 | <input type="checkbox"/><br>n.v.t. |
| 5. Een gespannen of drukkend gevoel in het bekkengebied?                                      | <input type="checkbox"/><br>1 | <input type="checkbox"/><br>2 | <input type="checkbox"/><br>3 | <input type="checkbox"/><br>4 | <input type="checkbox"/><br>5 | <input type="checkbox"/><br>n.v.t. |
| 6. Veelvuldig plassen overdag?                                                                | <input type="checkbox"/><br>1 | <input type="checkbox"/><br>2 | <input type="checkbox"/><br>3 | <input type="checkbox"/><br>4 | <input type="checkbox"/><br>5 | <input type="checkbox"/><br>n.v.t. |
| 7. Veelvuldig plassen 's nachts?                                                              | <input type="checkbox"/><br>1 | <input type="checkbox"/><br>2 | <input type="checkbox"/><br>3 | <input type="checkbox"/><br>4 | <input type="checkbox"/><br>5 | <input type="checkbox"/><br>n.v.t. |
| 8. Een gevoel van vermoeidheid?                                                               | <input type="checkbox"/><br>1 | <input type="checkbox"/><br>2 | <input type="checkbox"/><br>3 | <input type="checkbox"/><br>4 | <input type="checkbox"/><br>5 | <input type="checkbox"/><br>n.v.t. |

De volgende vragen gaan over de invloed die symptomen van myomen hebben op uw leven. Geef bij elke vraag aan welk antwoord het beste past bij uw ervaringen met myomen in de afgelopen drie maanden.

Er zijn geen goede of foute antwoorden. Beantwoord elke vraag door het keuzevakje aan te vinken (✓) dat het beste bij uw antwoord past. Als een vraag niet op u van toepassing is, vinkt u het antwoord "Niet van toepassing" aan.

| Gedurende de afgelopen drie maanden, hoe vaak hebben uw symptomen, gerelateerd aan myomen... |                                                                                                                      | Nooit                         | Heel af en toe                | Soms                          | Vaak                          | Altijd                        | Niet van toepassing                |
|----------------------------------------------------------------------------------------------|----------------------------------------------------------------------------------------------------------------------|-------------------------------|-------------------------------|-------------------------------|-------------------------------|-------------------------------|------------------------------------|
| 9.                                                                                           | U onzeker gemaakt over het beginmoment en de duur van uw menstruatieperiode?                                         | <input type="checkbox"/><br>1 | <input type="checkbox"/><br>2 | <input type="checkbox"/><br>3 | <input type="checkbox"/><br>4 | <input type="checkbox"/><br>5 | <input type="checkbox"/><br>n.v.t. |
| 10.                                                                                          | U onzeker gemaakt over het maken van reizen?                                                                         | <input type="checkbox"/><br>1 | <input type="checkbox"/><br>2 | <input type="checkbox"/><br>3 | <input type="checkbox"/><br>4 | <input type="checkbox"/><br>5 | <input type="checkbox"/><br>n.v.t. |
| 11.                                                                                          | Uw lichamelijke activiteiten belemmerd?                                                                              | <input type="checkbox"/><br>1 | <input type="checkbox"/><br>2 | <input type="checkbox"/><br>3 | <input type="checkbox"/><br>4 | <input type="checkbox"/><br>5 | <input type="checkbox"/><br>n.v.t. |
| 12.                                                                                          | Geleid tot vermoeidheid of uitputting?                                                                               | <input type="checkbox"/><br>1 | <input type="checkbox"/><br>2 | <input type="checkbox"/><br>3 | <input type="checkbox"/><br>4 | <input type="checkbox"/><br>5 | <input type="checkbox"/><br>n.v.t. |
| 13.                                                                                          | Gemaakt dat u de tijd die u normaal gesproken besteedt aan sport of andere vormen van lichaamsbeweging, verminderde? | <input type="checkbox"/><br>1 | <input type="checkbox"/><br>2 | <input type="checkbox"/><br>3 | <input type="checkbox"/><br>4 | <input type="checkbox"/><br>5 | <input type="checkbox"/><br>n.v.t. |
| 14.                                                                                          | U het gevoel gegeven dat u uw leven niet zelf in de hand heeft?                                                      | <input type="checkbox"/><br>1 | <input type="checkbox"/><br>2 | <input type="checkbox"/><br>3 | <input type="checkbox"/><br>4 | <input type="checkbox"/><br>5 | <input type="checkbox"/><br>n.v.t. |
| 15.                                                                                          | U bezorgd gemaakt over het vies worden van uw ondergoed?                                                             | <input type="checkbox"/><br>1 | <input type="checkbox"/><br>2 | <input type="checkbox"/><br>3 | <input type="checkbox"/><br>4 | <input type="checkbox"/><br>5 | <input type="checkbox"/><br>n.v.t. |
| 16.                                                                                          | U het gevoel gegeven dat u minder productief bent?                                                                   | <input type="checkbox"/><br>1 | <input type="checkbox"/><br>2 | <input type="checkbox"/><br>3 | <input type="checkbox"/><br>4 | <input type="checkbox"/><br>5 | <input type="checkbox"/><br>n.v.t. |
| 17.                                                                                          | Geleid tot een gevoel van sufheid of slaperigheid overdag?                                                           | <input type="checkbox"/><br>1 | <input type="checkbox"/><br>2 | <input type="checkbox"/><br>3 | <input type="checkbox"/><br>4 | <input type="checkbox"/><br>5 | <input type="checkbox"/><br>n.v.t. |
| 18.                                                                                          | U het gevoel gegeven dat u bent aangekomen?                                                                          | <input type="checkbox"/><br>1 | <input type="checkbox"/><br>2 | <input type="checkbox"/><br>3 | <input type="checkbox"/><br>4 | <input type="checkbox"/><br>5 | <input type="checkbox"/><br>n.v.t. |
| 19.                                                                                          | U het gevoel gegeven dat het moeilijk is om uw dagelijkse bezigheden te verrichten?                                  | <input type="checkbox"/><br>1 | <input type="checkbox"/><br>2 | <input type="checkbox"/><br>3 | <input type="checkbox"/><br>4 | <input type="checkbox"/><br>5 | <input type="checkbox"/><br>n.v.t. |
| 20.                                                                                          | Uw sociale activiteiten belemmerd?                                                                                   | <input type="checkbox"/><br>1 | <input type="checkbox"/><br>2 | <input type="checkbox"/><br>3 | <input type="checkbox"/><br>4 | <input type="checkbox"/><br>5 | <input type="checkbox"/><br>n.v.t. |
| 21.                                                                                          | U het gevoel gegeven dat uw buik groter is dan normaal en er anders uitziet?                                         | <input type="checkbox"/><br>1 | <input type="checkbox"/><br>2 | <input type="checkbox"/><br>3 | <input type="checkbox"/><br>4 | <input type="checkbox"/><br>5 | <input type="checkbox"/><br>n.v.t. |
| 22.                                                                                          | U bezorgd gemaakt over het vies worden van beddengoed?                                                               | <input type="checkbox"/><br>1 | <input type="checkbox"/><br>2 | <input type="checkbox"/><br>3 | <input type="checkbox"/><br>4 | <input type="checkbox"/><br>5 | <input type="checkbox"/><br>n.v.t. |

| Gedurende de afgelopen drie maanden, hoe vaak hebben uw symptomen, gerelateerd aan myomen... |                                                                                                                                     | Nooit                         | Heel af en toe                | Soms                          | Vaak                          | Altijd                        | Niet van toepassing                |
|----------------------------------------------------------------------------------------------|-------------------------------------------------------------------------------------------------------------------------------------|-------------------------------|-------------------------------|-------------------------------|-------------------------------|-------------------------------|------------------------------------|
| 23.                                                                                          | U verdrietig, moedeloos of wanhopig gemaakt?                                                                                        | <input type="checkbox"/><br>1 | <input type="checkbox"/><br>2 | <input type="checkbox"/><br>3 | <input type="checkbox"/><br>4 | <input type="checkbox"/><br>5 | <input type="checkbox"/><br>n.v.t. |
| 24.                                                                                          | U somber gemaakt?                                                                                                                   | <input type="checkbox"/><br>1 | <input type="checkbox"/><br>2 | <input type="checkbox"/><br>3 | <input type="checkbox"/><br>4 | <input type="checkbox"/><br>5 | <input type="checkbox"/><br>n.v.t. |
| 25.                                                                                          | U uitgeput?                                                                                                                         | <input type="checkbox"/><br>1 | <input type="checkbox"/><br>2 | <input type="checkbox"/><br>3 | <input type="checkbox"/><br>4 | <input type="checkbox"/><br>5 | <input type="checkbox"/><br>n.v.t. |
| 26.                                                                                          | Geleid tot bezorgdheid of ongerustheid over uw gezondheid?                                                                          | <input type="checkbox"/><br>1 | <input type="checkbox"/><br>2 | <input type="checkbox"/><br>3 | <input type="checkbox"/><br>4 | <input type="checkbox"/><br>5 | <input type="checkbox"/><br>n.v.t. |
| 27.                                                                                          | Geleid tot het zorgvuldiger plannen van uw activiteiten?                                                                            | <input type="checkbox"/><br>1 | <input type="checkbox"/><br>2 | <input type="checkbox"/><br>3 | <input type="checkbox"/><br>4 | <input type="checkbox"/><br>5 | <input type="checkbox"/><br>n.v.t. |
| 28.                                                                                          | U een gevoel van ongemak gegeven omdat u altijd extra maandverband, tampons of ondergoed mee moet nemen om ongelukjes te voorkomen? | <input type="checkbox"/><br>1 | <input type="checkbox"/><br>2 | <input type="checkbox"/><br>3 | <input type="checkbox"/><br>4 | <input type="checkbox"/><br>5 | <input type="checkbox"/><br>n.v.t. |
| 29.                                                                                          | Geleid tot schaamte?                                                                                                                | <input type="checkbox"/><br>1 | <input type="checkbox"/><br>2 | <input type="checkbox"/><br>3 | <input type="checkbox"/><br>4 | <input type="checkbox"/><br>5 | <input type="checkbox"/><br>n.v.t. |
| 30.                                                                                          | U onzeker gemaakt over uw toekomst?                                                                                                 | <input type="checkbox"/><br>1 | <input type="checkbox"/><br>2 | <input type="checkbox"/><br>3 | <input type="checkbox"/><br>4 | <input type="checkbox"/><br>5 | <input type="checkbox"/><br>n.v.t. |
| 31.                                                                                          | U prikkelbaar gemaakt?                                                                                                              | <input type="checkbox"/><br>1 | <input type="checkbox"/><br>2 | <input type="checkbox"/><br>3 | <input type="checkbox"/><br>4 | <input type="checkbox"/><br>5 | <input type="checkbox"/><br>n.v.t. |
| 32.                                                                                          | U bezorgd gemaakt over het vies worden van uw broek?                                                                                | <input type="checkbox"/><br>1 | <input type="checkbox"/><br>2 | <input type="checkbox"/><br>3 | <input type="checkbox"/><br>4 | <input type="checkbox"/><br>5 | <input type="checkbox"/><br>n.v.t. |
| 33.                                                                                          | Invloed gehad op de maat van de kleding die u tijdens uw menstruatieperiode draagt?                                                 | <input type="checkbox"/><br>1 | <input type="checkbox"/><br>2 | <input type="checkbox"/><br>3 | <input type="checkbox"/><br>4 | <input type="checkbox"/><br>5 | <input type="checkbox"/><br>n.v.t. |
| 34.                                                                                          | U het gevoel gegeven dat u uw gezondheid niet zelf in de hand heeft?                                                                | <input type="checkbox"/><br>1 | <input type="checkbox"/><br>2 | <input type="checkbox"/><br>3 | <input type="checkbox"/><br>4 | <input type="checkbox"/><br>5 | <input type="checkbox"/><br>n.v.t. |
| 35.                                                                                          | U een gevoel van zwakte gegeven, een totaal gebrek aan energie?                                                                     | <input type="checkbox"/><br>1 | <input type="checkbox"/><br>2 | <input type="checkbox"/><br>3 | <input type="checkbox"/><br>4 | <input type="checkbox"/><br>5 | <input type="checkbox"/><br>n.v.t. |
| 36.                                                                                          | Uw zin in seks verminderd?                                                                                                          | <input type="checkbox"/><br>1 | <input type="checkbox"/><br>2 | <input type="checkbox"/><br>3 | <input type="checkbox"/><br>4 | <input type="checkbox"/><br>5 | <input type="checkbox"/><br>n.v.t. |
| 37.                                                                                          | Geleid tot het vermijden van seksuele contacten?                                                                                    | <input type="checkbox"/><br>1 | <input type="checkbox"/><br>2 | <input type="checkbox"/><br>3 | <input type="checkbox"/><br>4 | <input type="checkbox"/><br>5 | <input type="checkbox"/><br>n.v.t. |
