# Supplementary material for: The (cost) effectiveness of procedural sedation and analgesia versus general anaesthesia for hysteroscopic myomectomy, a multicentre randomised controlled trial: PROSECCO trial, a study protocol
Source: Springer Nature journal article supplement (doi:10.1186/s12905-019-0742-1), 2019-03-22
Supplement: MOESM6 [file 16571088]

## Vragenlijst evaluatie recidief na hysteroscopische myoomresectie

Het is nu een jaar geleden dat u de hysteroscopische myoomresectie heeft ondergaan (het verwijderen van de vleesboom met een kijkbuisje via de vagina). Wij zijn benieuwd of deze vleesboom het afgelopen jaar is teruggekomen en of u hiervoor een behandeling hebt ondergaan. Geef u daarom zo nauwkeurig mogelijk antwoord op onderstaande vragen, door het juiste hokje aan te vinken.

1. Datum van invullen: .....(dd/mm/jaar)

2. Is de vleesboom waarvoor u behandeld bent het afgelopen jaar teruggekomen?

Ja

Nee

Indien u de vorige vraag met ja hebt beantwoord, ga dan verder met vraag 3.  
Indien u de vorige vraag met nee hebt behandeld, dan is dit het einde van de vragenlijst.

3. Kreeg u opnieuw klachten door het terugkomen van de vleesboom?

Ja

Nee

Indien u de vorige vraag met ja hebt beantwoord:

4. Hebt u hiervoor een behandeling ondergaan?

Ja

Nee

Indien u de vorige vraag met ja hebt beantwoord:

5. Welke behandeling hebt u ondergaan?

- Gestart met medicatie vanwege uw menstruatiecyclus? (de pil, MIRENA spiraaltje, cyklokapron)

Datum: .....

- Het verwijderen van de vleesboom met een kijkbuisje via de vagina (hysteroscopische myoomresectie)

Datum: .....

- Het wegbranden van het baarmoederslijmvlies (endometrium ablatie)

Datum: .....

- Het verwijderen van de baarmoeder
  - via de vagina
  - via de buik
  - met kijkbuisjes (laparoscopisch)

Datum: .....

Einde vragenlijst.
