# Supplementary material for: The (cost) effectiveness of procedural sedation and analgesia versus general anaesthesia for hysteroscopic myomectomy, a multicentre randomised controlled trial: PROSECCO trial, a study protocol
Source: Springer Nature journal article supplement (doi:10.1186/s12905-019-0742-1), 2019-03-22
Supplement: MOESM7 [file 16571088]

**Questionnaire for evaluation of recurrence after hysteroscopic myomectomy**

It has been a year since you underwent the hysteroscopic myomectomy (the removal of a fibroid with a small instrument through the vagina).

We would like to know if you experienced a recurrence of your fibroid and whether or not you underwent treatment for this during the last year.

To evaluate this, please answer the following questions by checking the appropriate box.

1. Date while filling in this questionnaire: .....(day/month/year)

2. Did the fibroid, that you were operated for, return in the last year?

Yes

No

Did you check yes? Go to question 3. Otherwise, this is the end of the questionnaire.

3. Did you experience new complaints because the fibroid did return?

Yes

No

Did you check yes? Go to question 4. Otherwise, this is the end of the questionnaire.

4. Did you receive treatment for this?

Yes

No

Did you check yes? Go to question 5. Otherwise, this is the end of the questionnaire.

5. Which treatment did you receive?

Start with medication because of your menstrual cycle? (oral contraception, MIRENA iud, cyklokapron)

Date: .....

Removal of the fibroid with a small instrument through the vagina (hysteroscopic myomectomy)

Date: .....

Operation to remove or thin the endometrium (the lining of the uterus (womb): endometrial ablation

Date: .....

Removal of the uterus (womb)

- through the vagina: vaginal hysterectomy
- through a cut in your tummy: abdominal hysterectomy
- by keyhole surgery: laparoscopic hysterectomy

Date: .....

End of the questionnaire
